# Supplementary material for: SLC4A11 depletion impairs NRF2 mediated antioxidant signaling and increases reactive oxygen species in human corneal endothelial cells during oxidative stress
Source: PubMed Central journal article supplement (PMC5481427; doi:10.1038/s41598-017-03654-4), 2017-06-22
Supplement: 41598_2017_3654_MOESM1_ESM.pdf [file 41598_2017_3654_MOESM1_ESM.pdf]

***SLC4A11* depletion impairs NRF2 mediated antioxidant signaling and increases reactive oxygen species in human corneal endothelial cells during oxidative stress**

**Sanjukta Guha<sup>1,2</sup>, Sunita Chaurasia<sup>2</sup>, Charanya Ramachandran<sup>1,2</sup>, Sanhita Roy<sup>1,2\*</sup>**

<sup>1</sup> Prof. Brien Holden Eye Research Center, Hyderabad, India

<sup>2</sup> Tej Kohli Cornea Institute, Hyderabad, India

**Supplementary Information**

## Supplementary Figure 1

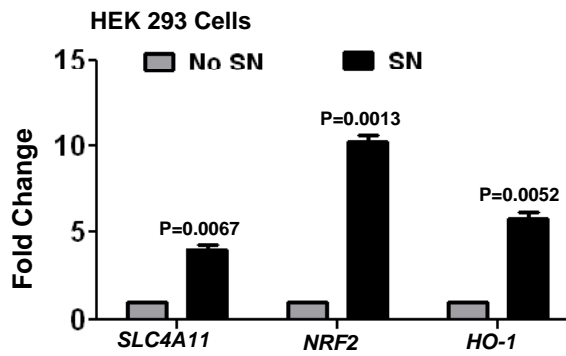

**Supplementary Fig. 1: Selenite induces expression of *SLC4A11* and antioxidant genes.** HEK 293 cells were exposed to 10  $\mu$ M selenite for 4 h and fold changes of the expression of *SLC4A11*, *NRF2* and *HO-1* were determined by quantitative PCR.

## Supplementary Figure 2

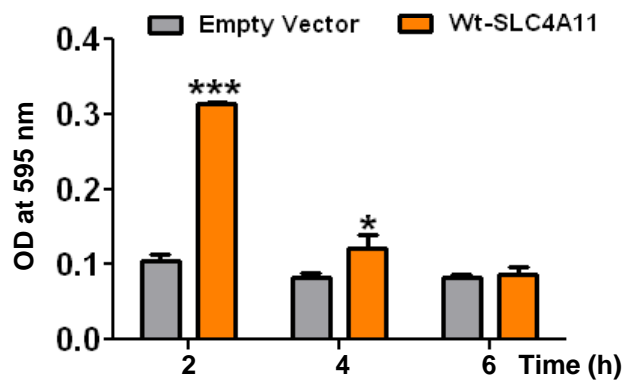

**Supplementary Fig. 2: Overexpression of SLC4A11 increases cell viability against oxidative stress.** Cells were transfected with wild-type *SLC4A11* plasmid or empty vectors and exposed to 10  $\mu$ M of SN for 2, 4 and 6 h and cell viability was determined by MTT assay.
